# Supplementary material for: The Arctic Predictability and Prediction on Seasonal-to-Interannual TimEscales (APPOSITE) data set version 1
Source: Copernicus journal article supplement (doi:10.5194/gmd-9-2255-2016), 2016-06-29
Supplement: Supplementary file 1 [file APPOSITE_diagnostics.xlsx]

## Sheet: Atmosphere
Inspired by CMOR output requirements; see http://cmip-pcmdi.llnl.gov/cmip5/output_req.html
Variable long name (CMOR)	Short name (CMOR)	Dimensions
2D atmospheric fields (monthly means)
Near-Surface Air Temperature [K]	tas	lon, lat, time
Sea Level Pressure [Pa]	psl	lon, lat, time
Near-Surface Relative Humidity [%]	hurs	lon, lat, time
Near-Surface Wind Speed [m/s]	sfcWind	lon, lat, time
Eastwards Near-Surface Wind [m/s]	uas	lon, lat, time
Northward Near-Surface Wind [m/s]	vas	lon, lat, time
Surface Downward Eastward Wind Stress [Pa]	tauu	lon, lat, time
Surface Downward Northward Wind Stress [Pa]	tauv	lon, lat, time
Precipitation [kg m-2 s]	pr	lon, lat, time
Snowfall Flux [kg m-2 s-1]	prsn	lon, lat, time
Convective Precipitation [kg m-2 s-1]	prc	lon, lat, time
Evaporation [kg m-2 s]	evspsbl	lon, lat, time
Surface Upward Latent Heat Flux [W m-2]	hfls	lon, lat, time
Surface Upward Sensible Heat Flux [W m-2]	hfss	lon, lat, time
Surface Downwelling Longwave Radiation [W m-2]	rlds	lon, lat, time
Surface Upwelling Longwave Radiation [W m-2]	rlus	lon, lat, time
Surface Downwelling Shortwave Radiation [W m-2]	rsds	lon, lat, time
Surface Upwelling Shortwave Radiation [W m-2]	rsus	lon, lat, time
Surface Downwelling Clear-Sky Shortwave Radiation [W m-2]	rsdscs	lon, lat, time
Surface Upwelling Clear-Sky Shortwave Radiation [W m-2]	rsuscs	lon, lat, time
TOA Incident Shortwave Radiation [W m-2]	rsdt	lon, lat, time
TOA Outgoing Shortwave Radiation [W m-2]	rsut	lon, lat, time
TOA Outgoing Longwave Radiation [W m-2]	rlut	lon, lat, time
TOA Outgoing Clear-Sky Longwave Radiation [W m-2]	rlutcs	lon, lat, time
TOA Outgoing Clear-Sky Shortwave Radiation [W m-2]	rsutcs	lon, lat, time
Water Vapor Path [kg m-2]	prw	lon, lat, time
Total Cloud Fraction [%]	clt	lon, lat, time
2D atmospheric fields (daily & monthly means)
Geopotential Height of 500 hPa [m]	zg500	lon,lat, time
Near-Surface Air Temperature [K]	tas	lon, lat, time
Eastwards Near-Surface Wind [m/s]	uas	lon, lat, time
Northward Near-Surface Wind [m/s]	vas	lon, lat, time
3D atmospheric fields (monthly means)
Air Temperature [K]	ta	lon, lat, alev, time
Eastward Wind [m/s]	ua	lon, lat, alev, time
Northward Wind [m/s]	va	lon, lat, alev, time
omega(=dp/dt) [Pa s-1]	wap	lon, lat, alev, time
Specific Humidity [1]	hus	lon, lat, alev, time
Cloud Area Fraction [%]	cl	lon, lat, alev, time
Mass Fraction of Cloud Liquid Water [1]	clw	lon, lat, alev, time
Mass Fraction of Cloud Ice [1]	cli	lon, lat, alev, time
Advanced diagnostics (monthly means)
Northward Atmospheric Heat Transport [W]	htan	lon, lat, time
Eastward Atmospheric Heat Transport [W]	htae	lon, lat, time
Northward Atmospheric Water Transport [W]	wtan	lon, lat, time
Eastward Atmospheric Water Transport [W]	wtae	lon, lat, time
Albedo of Melt Ponds on Sea Ice [1]	alsom	lon, lat, time
Melt Pond Depth on Sea Ice [m]	sicepdw	lon, lat, time
Ice Thickness on Melt Pond [m]	sicepdi	lon, lat, time
Ice Temperature on Frozen Melt Pond [K]	tsicepdi	lon, lat, time
Total Melt Pond Depth [m]	ameltdepth	lon, lat, time
Fractional Area of Melt Ponds on Sea Ice [1]	ameltfrac	lon, lat, time

## Sheet: Cryosphere
Variable long name (CMOR)	Short name (CMOR)	Dimensions
Sea ice (daily & monthly means)
Sea Ice Area Fraction [1]	sic	lon, lat, time
Sea Ice Thickness [m]	sit	lon, lat, time
Snow Depth on Sea Ice [m]	snd	lon, lat, time
Surface Temperature of Sea Ice [K]	tsice (or ts)	lon, lat, time
Downwelling Shortwave over Sea Ice [W m-2]	rsdssi	lon, lat, time
Upward Shortwave over Sea Ice [W m-2]	rsussi	lon, lat, time
X-Component of Sea Ice Mass Transport [kg s-1]	transix	lon, lat, time
Y-Component of Sea Ice Mass Transport [kg s-1]	transiy	lon, lat, time
X-Component of Sea Ice Velocity [m s-1]	usi	lon, lat, time
Y-Component of Sea Ice Velocity [m s-1]	vsi	lon, lat, time
Rate of Melt at Upper surface of sea ice [kg m-2 s-1]	tmelt	lon, lat, time
Rate of melt at sea ice base [kg m-2 s-1]	smelt	lon, lat, time
Albedo??
Snow (daily and monthly means)
Snow Area Fraction [%]	snc	lon, lat, time
Surface Snow Amount [kg m-2]	snw	lon, lat, time

## Sheet: Ocean
Variable long name (CMOR)	Short name (CMOR)	Dimensions
2D ocean fields (monthly means)
Sea Surface Temperature [K]	tos	lon, lat, time
Sea Surface Salinity [psu]	sos	lon, lat, time
Water Flux into Sea Water From Rivers [kg m-2 s-1]	friver	lon, lat, time
Ocean Mixed Layer Thickness Defined by Sigma T [m]	mlotst	lon, lat, time
3D ocean fields (monthly means)
Sea Water Potential Temperature [K]	thetao	lon, lat, olev, time
Sea Water Salinity [psu]	so	lon, lat, olev, time
Sea Water Potential Density [kg m-3]	rhopoto	lon, lat, olev, time
Sea Water X Velocity [m s-1]	uo	lon, lat, olev, time
Sea Water Y Velocity [m s-1]	vo	lon, lat, olev, time
Advanced diagnostics (2D monthly means)
Ocean Heat X Transport [W]	hfx	lon, lat, time
Ocean Heat Y Transport [W]	hfy	lon, lat, time
Ocean Heat X Transport due to Bolus Advection [W]	hfxba	lon, lat, time
Ocean Heat Y Transport due to Bolus Advection [W]	hfyba	lon, lat, time
Ocean Heat X Transport due to Diffusion [W]	hfxdiff	lon, lat, time
Ocean Heat Y Transport due to Diffusion [W]	hfydiff	lon, lat, time
Ocean Salinity X Transport [W]		lon, lat, time
Ocean Salinity Y Transport [W]		lon, lat, time
Ocean Meridional Overturning Mass Streamfunction [kg s-1]	msftmyz	lat, olev, basin, time
Ocean Meridional Overturning Mass Streamfunction Global [kg s-1]	msftmyzg	lat, olev, time
Ocean Meridional Overturning Mass Streamfunction Atlantic [kg s-1]	msftmyza	lat, olev, time
Ocean Meridional Overturning Mass Streamfunction Global [kg s-1]	msftmyzp	lat, olev, time
