# Supplementary material for: The Arctic Predictability and Prediction on Seasonal-to-Interannual TimEscales (APPOSITE) data set version 1
Source: Copernicus journal article supplement (doi:10.5194/gmd-9-2255-2016), 2016-06-29
Supplement: Supplementary file [file gmd-9-2255-2016-supplement-title-page.pdf › gmd-9-2255-2016-supplement-title-page.pdf]

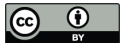

## *Supplement of*

# **The Arctic Predictability and Prediction on Seasonal-to-Interannual TimeScales (APPOSITE) data set version 1**

**Jonathan J. Day et al.**

*Correspondence to:* Jonathan J. Day ([j.j.day@reading.ac.uk](mailto:j.j.day@reading.ac.uk))

- [gmd-9-2255-2016-supplement-title-page.pdf](#)
- [APPOSITE\\_diagnostics.xlsx](#)
- [APPOSITE\\_draft\\_experimental\\_design\\_GMD.pdf](#)
- [\\_\\_MACOSX](#)
  - [.\\_APPOSITE\\_diagnostics.xlsx](#)
  - [.\\_APPOSITE\\_draft\\_experimental\\_design\\_GMD.pdf](#)

The copyright of individual parts of the supplement might differ from the CC-BY 3.0 licence.
